# Supplementary material for: A Unique Urinary Metabolic Feature for the Determination of Bladder Cancer, Prostate Cancer, and Renal Cell Carcinoma
Source: MDPI journal article supplement (doi:10.3390/metabo11090591), 2021-09-02
Supplement: s1 [file s1]

**Table S1.** Identified and quantified urinary metabolites from <sup>1</sup>H-NMR spectra. Values are median (mM) and IQR (Interquartile range) of normalized concentration. Statistical analyses of metabolites levels were conducted by using Kolmogorov-Smirnov test for normality and non-parametric analysis of covariance followed by Bonferroni correction method for significant differences among groups.

| Metabolites             | BCa    |       |                                 | PCa    |       |                                 | RCC    |       |                                 | Significance<br>(adjusted <i>p</i> -value) | Multiple<br>Comparison<br>Analysis |
|-------------------------|--------|-------|---------------------------------|--------|-------|---------------------------------|--------|-------|---------------------------------|--------------------------------------------|------------------------------------|
|                         | Median | IQR   | Normality<br>( <i>p</i> -value) | Median | IQR   | Normality<br>( <i>p</i> -value) | Median | IQR   | Normality<br>( <i>p</i> -value) |                                            |                                    |
| 2-Hydroxyisobutyrate    | 0.041  | 0.024 | 2.00E-01                        | 0.038  | 0.013 | 1.14E-02                        | 0.043  | 0.033 | 2.00E-01                        | 1.006                                      |                                    |
| 3-Hydroxyisobutyrate    | 0.060  | 0.041 | 2.45E-02                        | 0.051  | 0.028 | 5.57E-02                        | 0.048  | 0.031 | 6.82E-02                        | 0.181                                      |                                    |
| 3-Hydroxyisovalerate    | 0.032  | 0.017 | 2.57E-07                        | 0.029  | 0.012 | 2.90E-03                        | 0.035  | 0.024 | 2.00E-01                        | 1.412                                      |                                    |
| 4-Hydroxybenzoate       | 0.055  | 0.063 | 7.98E-03                        | 0.099  | 0.120 | 2.39E-03                        | 0.059  | 0.050 | 1.14E-01                        | 0.024*                                     | B=R; B<P; R<P                      |
| 4-Hydroxyphenylacetate  | 0.090  | 0.072 | 1.94E-09                        | 0.094  | 0.128 | 7.16E-03                        | 0.103  | 0.049 | 2.00E-01                        | 0.487                                      |                                    |
| Acetate                 | 0.067  | 0.035 | 6.20E-04                        | 0.051  | 0.038 | 1.85E-04                        | 0.102  | 0.023 | 1.14E-08                        | 0.007**                                    | B=P; B<R; P<R                      |
| Alanine                 | 0.228  | 0.131 | 2.00E-01                        | 0.24   | 0.135 | 8.04E-02                        | 0.190  | 0.132 | 3.69E-02                        | 1.941                                      |                                    |
| Arabinitol              | 0.447  | 0.272 | 1.15E-06                        | 0.499  | 0.376 | 3.78E-05                        | 0.456  | 0.156 | 2.00E-01                        | 0.611                                      |                                    |
| Betaine                 | 0.110  | 0.121 | 1.04E-03                        | 0.097  | 0.081 | 1.25E-01                        | 0.139  | 0.156 | 1.79E-02                        | 0.261                                      |                                    |
| Carnitine               | 0.084  | 0.151 | 5.24E-02                        | 0.042  | 0.071 | 4.86E-10                        | 0.100  | 0.086 | 1.57E-02                        | 1.192                                      |                                    |
| Choline                 | 0.044  | 0.022 | 5.40E-12                        | 0.041  | 0.026 | 7.40E-08                        | 0.041  | 0.024 | 2.16E-09                        | 2.805                                      |                                    |
| Citrate                 | 2.732  | 2.528 | 2.00E-01                        | 2.198  | 1.734 | 2.00E-01                        | 2.406  | 1.928 | 1.32E-01                        | 2.245                                      |                                    |
| Creatine                | 0.134  | 0.084 | 4.94E-10                        | 0.173  | 0.171 | 1.19E-06                        | 0.254  | 0.557 | 3.16E-04                        | 1.908                                      |                                    |
| Creatinine              | 8.580  | 2.917 | 2.00E-01                        | 6.601  | 2.302 | 3.85E-02                        | 6.412  | 3.991 | 2.00E-01                        | 0.002**                                    | B>P; B>R; P=R                      |
| Dimethylamine           | 0.507  | 0.126 | 1.05E-01                        | 0.448  | 0.190 | 2.00E-01                        | 0.563  | 0.448 | 1.19E-01                        | 0.295                                      |                                    |
| Formate                 | 0.276  | 0.219 | 2.72E-02                        | 0.252  | 0.182 | 3.05E-02                        | 0.360  | 0.357 | 2.00E-01                        | 0.912                                      |                                    |
| Gluconate               | 0.393  | 0.129 | 6.32E-12                        | 0.400  | 0.132 | 1.57E-03                        | 0.508  | 0.319 | 2.00E-01                        | 0.724                                      |                                    |
| Glucose                 | 0.343  | 0.219 | 3.92E-14                        | 0.392  | 0.262 | 2.61E-11                        | 0.456  | 0.297 | 2.87E-02                        | 1.265                                      |                                    |
| Glutamine               | 0.189  | 0.100 | 4.30E-02                        | 0.234  | 0.089 | 2.00E-01                        | 0.137  | 0.073 | 2.00E-01                        | < 0.001***                                 | B=P; R<B; R<P                      |
| Glycine                 | 0.580  | 0.303 | 3.43E-07                        | 0.808  | 0.441 | 2.00E-01                        | 0.645  | 0.364 | 2.08E-02                        | 0.280                                      |                                    |
| Glycolate               | 0.307  | 0.191 | 1.08E-01                        | 0.296  | 0.124 | 7.61E-05                        | 0.406  | 0.224 | 2.00E-01                        | 2.407                                      |                                    |
| Hippurate               | 0.757  | 0.868 | 1.93E-02                        | 0.688  | 1.235 | 3.42E-02                        | 0.752  | 1.284 | 1.09E-01                        | 2.951                                      |                                    |
| Histidine               | 0.458  | 0.230 | 2.00E-01                        | 0.522  | 0.473 | 2.02E-02                        | 0.357  | 0.174 | 9.90E-03                        | 0.196                                      |                                    |
| Lactate                 | 0.105  | 0.076 | 6.38E-11                        | 0.104  | 0.071 | 2.00E-01                        | 0.112  | 0.055 | 8.02E-02                        | 0.577                                      |                                    |
| Lysine                  | 0.104  | 0.089 | 8.53E-03                        | 0.089  | 0.101 | 6.04E-03                        | 0.086  | 0.060 | 2.00E-01                        | 1.338                                      |                                    |
| Mannitol                | 1.065  | 0.751 | 1.59E-10                        | 0.698  | 0.763 | 2.63E-04                        | 0.430  | 0.646 | 9.20E-05                        | 0.252                                      |                                    |
| Methionine              | 0.016  | 0.005 | 2.00E-01                        | 0.014  | 0.004 | 1.33E-01                        | 0.013  | 0.008 | 2.00E-01                        | 0.795                                      |                                    |
| N, N-Dimethylglycine    | 0.019  | 0.024 | 4.35E-02                        | 0.016  | 0.011 | 5.58E-05                        | 0.018  | 0.030 | 3.64E-02                        | 2.575                                      |                                    |
| N-Methylhydantoin       | 0.039  | 0.020 | 2.00E-01                        | 0.075  | 0.046 | 5.50E-04                        | 0.028  | 0.015 | 7.29E-02                        | < 0.001***                                 | P>B; P>R; B=R                      |
| N-Phenylacetylglutamine | 0.175  | 0.083 | 5.96E-02                        | 0.236  | 0.139 | 3.60E-03                        | 0.194  | 0.107 | 2.00E-01                        | 0.063                                      |                                    |

Table S1. *Cont.*

| Metabolites                    | BCa    |       |                                 | PCa    |       |                                 | RCC    |       |                                 | Significance<br>(adjusted <i>p</i> -value) | Multiple<br>Comparison<br>Analysis |
|--------------------------------|--------|-------|---------------------------------|--------|-------|---------------------------------|--------|-------|---------------------------------|--------------------------------------------|------------------------------------|
|                                | Median | IQR   | Normality<br>( <i>p</i> -value) | Median | IQR   | Normality<br>( <i>p</i> -value) | Median | IQR   | Normality<br>( <i>p</i> -value) |                                            |                                    |
| O-Acetylcarnitine              | 0.025  | 0.033 | 1.60E-03                        | 0.014  | 0.026 | 3.16E-07                        | 0.024  | 0.021 | 2.00E-01                        | 0.623                                      |                                    |
| Pseudouridine                  | 0.125  | 0.040 | 2.00E-01                        | 0.105  | 0.032 | 2.00E-01                        | 0.121  | 0.064 | 2.00E-01                        | 0.086                                      |                                    |
| Pyroglutamate                  | 0.195  | 0.069 | 2.00E-01                        | 0.151  | 0.079 | 1.25E-01                        | 0.179  | 0.106 | 2.00E-01                        | 0.087                                      |                                    |
| Succinate                      | 0.027  | 0.032 | 8.91E-04                        | 0.024  | 0.027 | 9.29E-03                        | 0.028  | 0.024 | 1.54E-01                        | 2.091                                      |                                    |
| Taurine                        | 1.182  | 0.820 | 1.23E-01                        | 1.856  | 1.369 | 2.00E-01                        | 1.463  | 1.145 | 2.00E-01                        | 0.358                                      |                                    |
| Trimethylamine <i>N</i> -oxide | 0.799  | 0.777 | 1.13E-02                        | 0.617  | 0.736 | 2.00E-05                        | 2.275  | 1.965 | 9.76E-03                        | 0.140                                      |                                    |
| Tyrosine                       | 0.101  | 0.049 | 1.07E-05                        | 0.085  | 0.022 | 2.00E-01                        | 0.089  | 0.080 | 7.49E-02                        | 0.940                                      |                                    |
| Valine                         | 0.031  | 0.008 | 1.22E-03                        | 0.029  | 0.008 | 2.00E-01                        | 0.029  | 0.012 | 6.00E-02                        | 0.568                                      |                                    |
| cis-Aconitate                  | 0.187  | 0.099 | 2.00E-01                        | 0.156  | 0.043 | 2.00E-01                        | 0.181  | 0.048 | 2.00E-01                        | 0.902                                      |                                    |
| myo-Inositol                   | 0.170  | 0.163 | 1.03E-06                        | 0.174  | 0.165 | 3.55E-02                        | 0.260  | 0.292 | 2.00E-01                        | 1.787                                      |                                    |

\* Significantly different with adjusted *p*-value < 0.05; \*\* Significantly different with adjusted *p*-value < 0.01; \*\*\* Significantly different with adjusted *p*-value < 0.001
